# Supplementary material for: The effect of statins on prostate cancer recurrence and mortality after definitive therapy: a systematic review and meta-analysis
Source: PubMed Central journal article supplement (PMC4935858; doi:10.1038/srep29106), 2016-07-07

## Additional Files

The effect of statins on prostate cancer recurrence and mortality after definitive therapy: a systematic review and meta-analysis

Ping Tan, M.D. <sup>a, b, \*</sup>, Shiyou Wei, M.D. <sup>c, \*</sup>, Lu Yang, Ph.D <sup>a, b, \*</sup>, Zhuang Tang, M.D. <sup>a, b</sup>, Dehong Cao, M.D. <sup>a, b</sup>, Liangren Liu, Ph.D <sup>a, b</sup>, Junhao Lei, M.D. <sup>a, b</sup>, Yu Fan, M.D. <sup>a, b</sup>, Liang Gao, M.D. <sup>a, b</sup>, Qiang Wei, M.D <sup>a, b</sup>

Additional file 1. Trial Identification, Inclusion, and Exclusion.

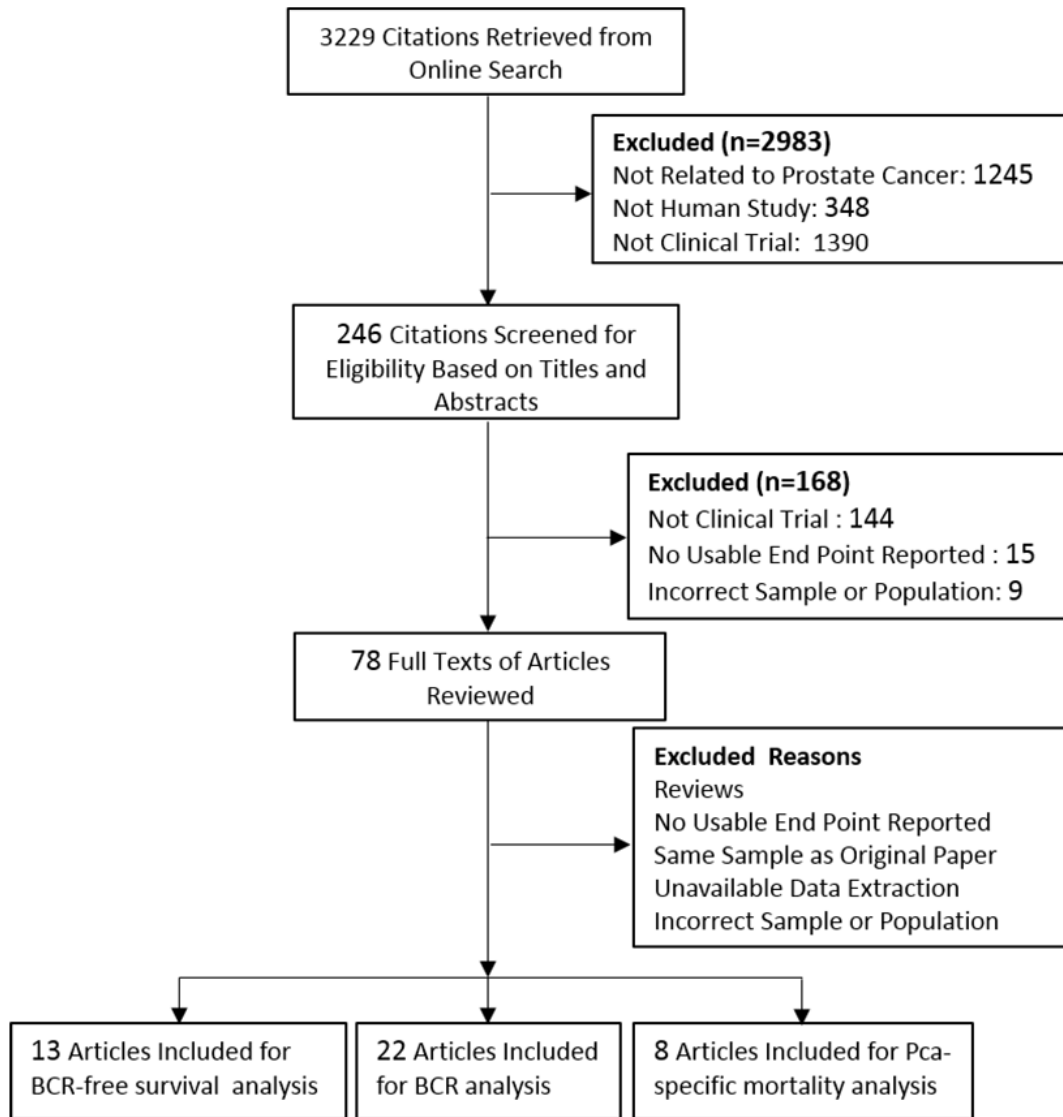

Additional file 2. Studies evaluating the association between long-term statins use and BCR risk of prostate cancer.

| Study                        | HR <sup>#</sup> | 95%CI     | Recurrence cases | Definition of long-term statin use |
|------------------------------|-----------------|-----------|------------------|------------------------------------|
| Song et al. 2015 (Korea)     | 0.64            | 0.40-1.05 | NR <sup>*</sup>  | >36 months                         |
| ishak-Howard et al.2014(US)  | 0.932           | 0.53-1.63 | NR               | >5 years                           |
| Kontraros et al.2013(Greece) | 1.63            | 1.02-2.60 | NR               | >2 years                           |
| Geybels et al.2013(US)       | 1.06            | 0.67-1.67 | 22               | >5 years                           |
| Mondul et al.2011(US)        | 0.77            | 0.41-1.42 | NR               | >1 years                           |
| Chao et al.2013(US)          | 0.96            | 0.64-1.46 | NR               | >500 days                          |
| Chao et al.2013(US)          | 1.04            | 0.67-1.64 | NR               | >500 days                          |

\*NR, not report; #HR, Hazard Ratio; 95%CI, 95% confidence intervals.

Additional file 3. The meta-analysis of effect of long-term statins use on BCR risk of prostate cancer.

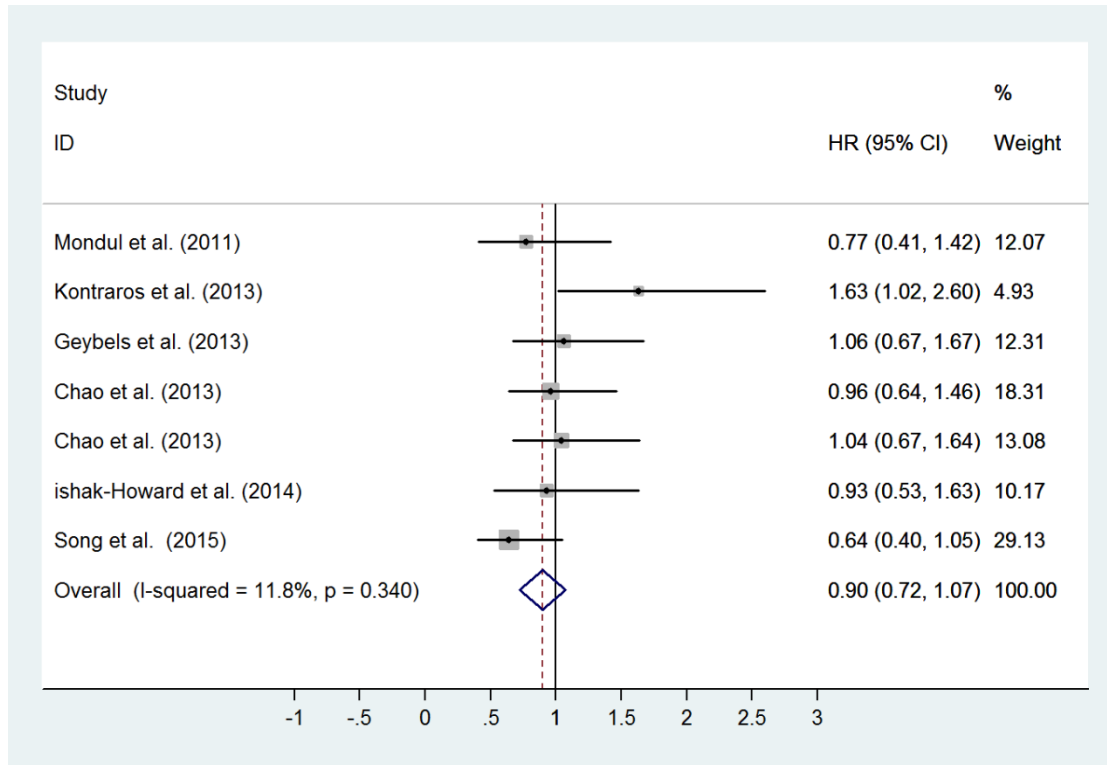

Additional file 4. Funnel plot for publication bias of 22 studies analysing BCR risk of prostate cancer.

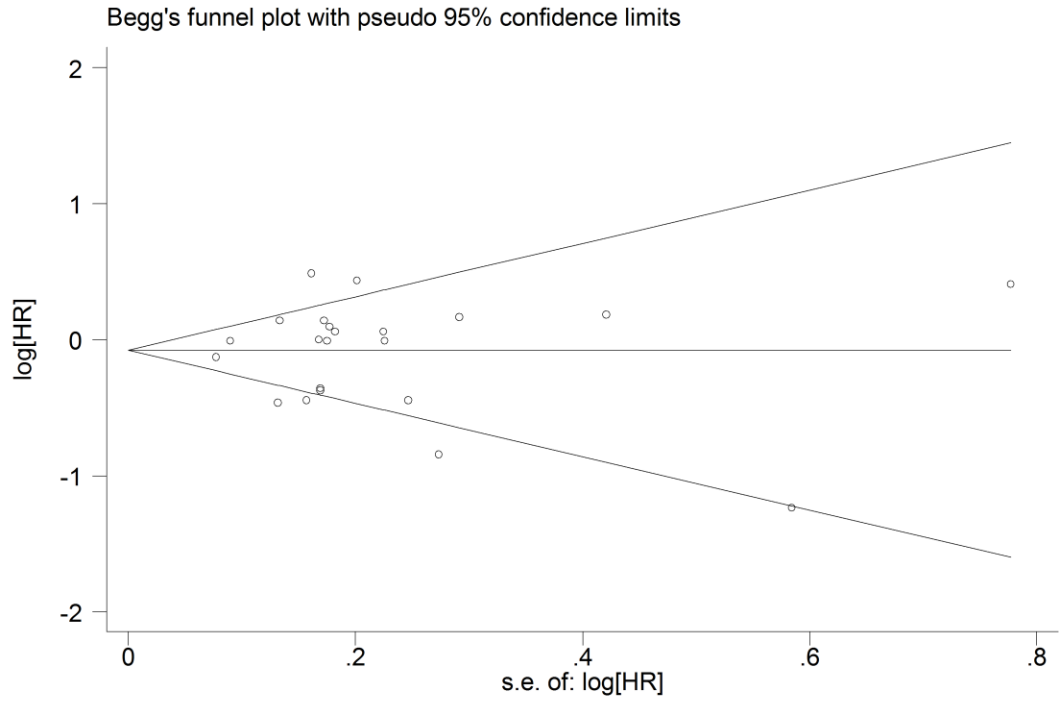

Supplement: srep29106-s1.pdf [file srep29106-s1.pdf]
